# Supplementary material for: HOXA5 and p53 cooperate to suppress lung cancer cell invasion and serve as good prognostic factors in non-small cell lung cancer
Source: PubMed Central journal article supplement — J Cancer. 2017 Apr 9;8(6):1071–81. doi: 10.7150/jca.17295 (PMC5436261; doi:10.7150/jca.17295), 2017-04-09
Supplement: jcav08p1071s1.pdf [file jcav08p1071s1.pdf]

## Supplementary Data

**Table S1. Chi square test of different HOXA5 expression location in non-small cell lung cancer tumor part**

| Cytoplasmic expression | Nuclear expression |           | P value |
|------------------------|--------------------|-----------|---------|
|                        | Negative           | Positive  |         |
| Negative               | 15 (31.3%)         | 7 (14.6%) | 0.002   |
| Positive               | 26 (54.1%)         | 0 (0%)    |         |

The above table was only performed in the tissue samples received from CTH of totally 48 cases.

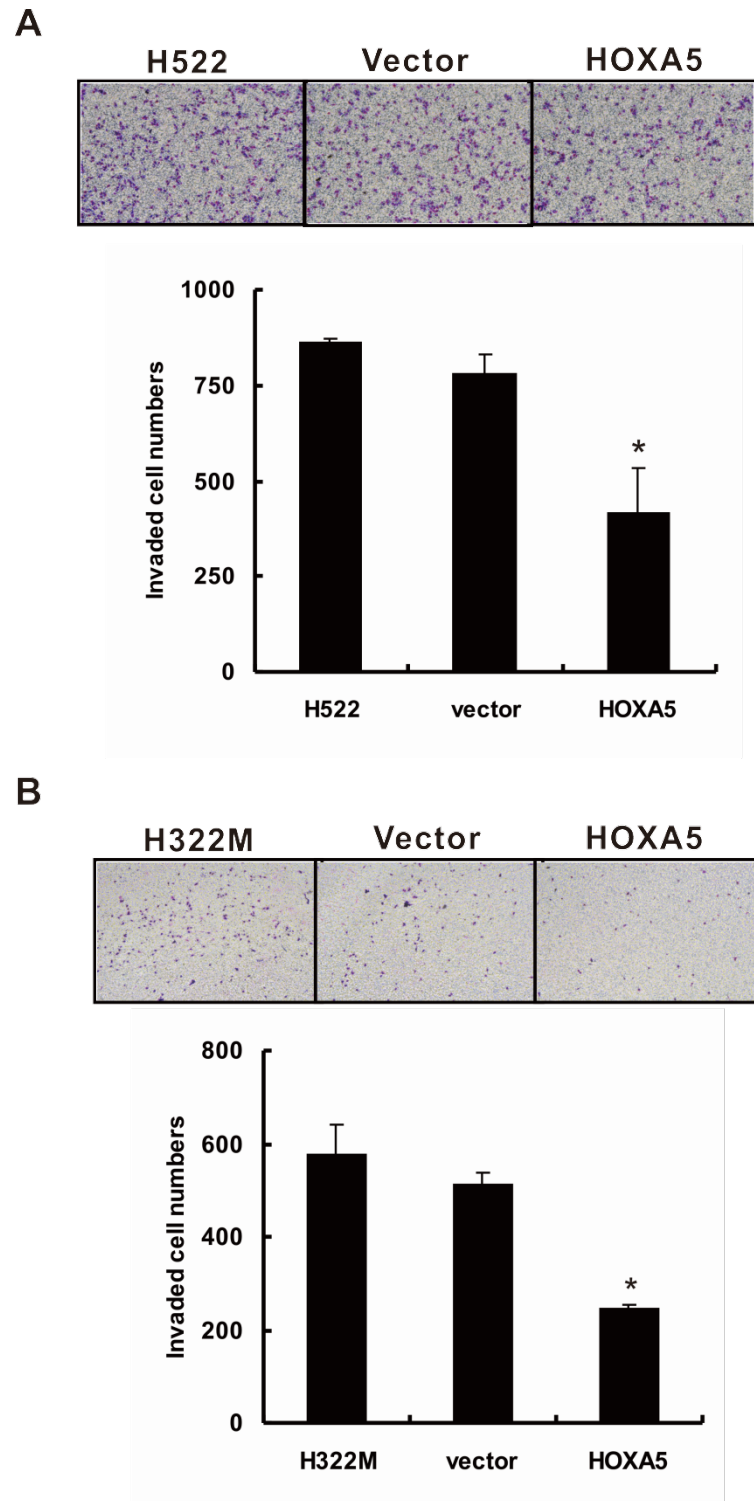

**Figure S1. Overexpression of HOXA5 could reduce invasion abilities in H522 and H322M cells.** (A) H522 (p53 P191 frameshift) (B) H322M (p53 R248L). Upper panel was representative images of invasion assay and lower panel was densitometry evaluation for invasive cells. Each experiment was performed in duplicate, mean  $\pm$  SD; \*,  $P < 0.05$  compared with vector control.
